# Supplementary material for: Gap-enhanced resonance Raman tags for live-cell imaging
Source: Royal Society of Chemistry journal article supplement (doi:10.1039/d0tb00659a), 2020-01-01
Supplement: d0tb00659a1.pdf [file d0tb00659a1.pdf]

## Supplementary Information

# Gap-enhanced Resonance Raman Tags for Live-Cell Imaging

*Yuqing Gu,<sup>†,‡</sup> Xinyuan Bi,<sup>‡</sup> and Jian Ye<sup>\*,†,‡,#</sup>*

<sup>†</sup>Department of Nuclear Medicine, Ruijin Hospital, School of Medicine, Shanghai Jiao Tong University, Shanghai 200025, P.R. China

<sup>‡</sup>State Key Laboratory of Oncogenes and Related Genes, School of Biomedical Engineering, Shanghai Jiao Tong University, Shanghai, P. R. China

<sup>#</sup>Shanghai Key Laboratory of Gynecologic Oncology, Ren Ji Hospital, School of Medicine, Shanghai Jiao Tong University, Shanghai, P. R. China

\*To whom correspondence should be addressed. E-mail: [yejian78@sjtu.edu.cn](mailto:yejian78@sjtu.edu.cn)

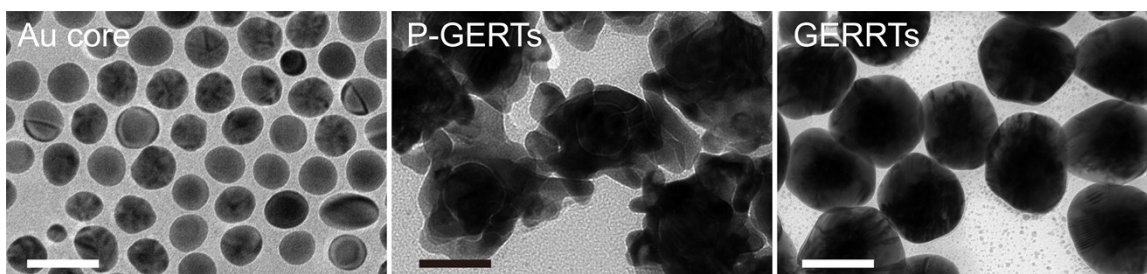

**Figure S1.** TEM images of Au cores, P-GERTs and GERRTs. Scale bars are 50 nm for Au cores and P-GERTs, and 100 nm for GERRTs.

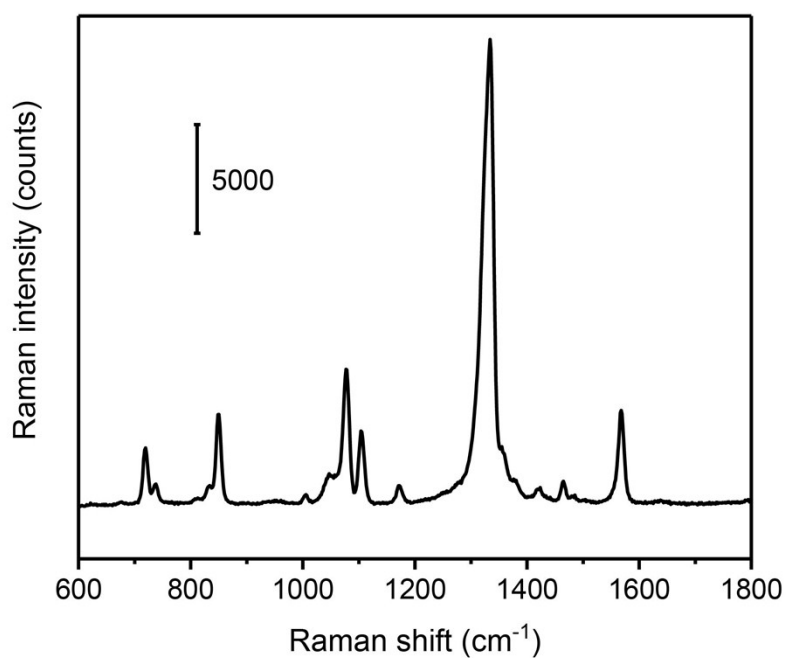

**Figure S2.** SERS spectrum of P-GERTs excited with 785 nm laser, 22 mW power, 2 s acquisition time and  $10\times$  objective lens.

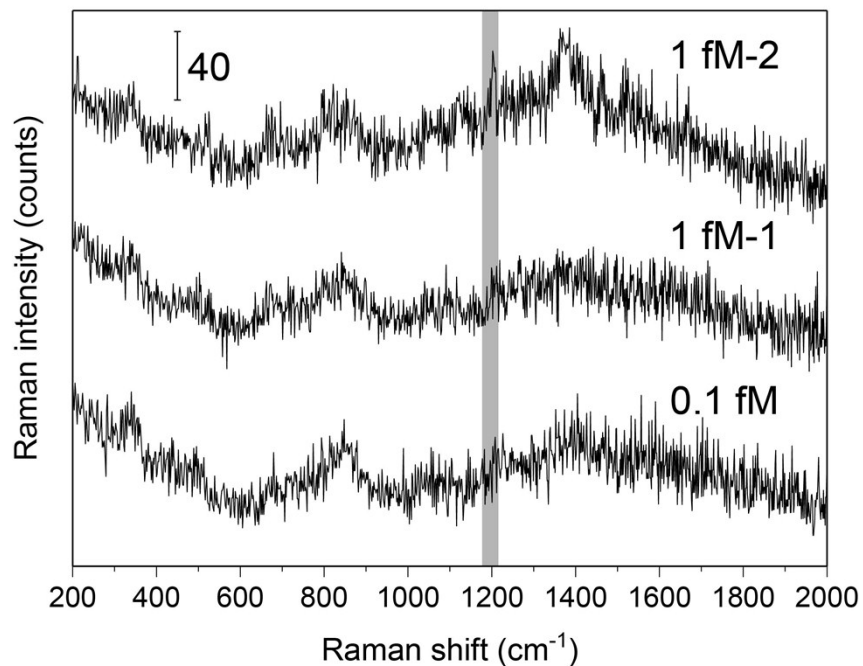

**Figure S3.** Representative SERS spectra of GERRTs at the concentrations of 1 fM and 0.1 fM.

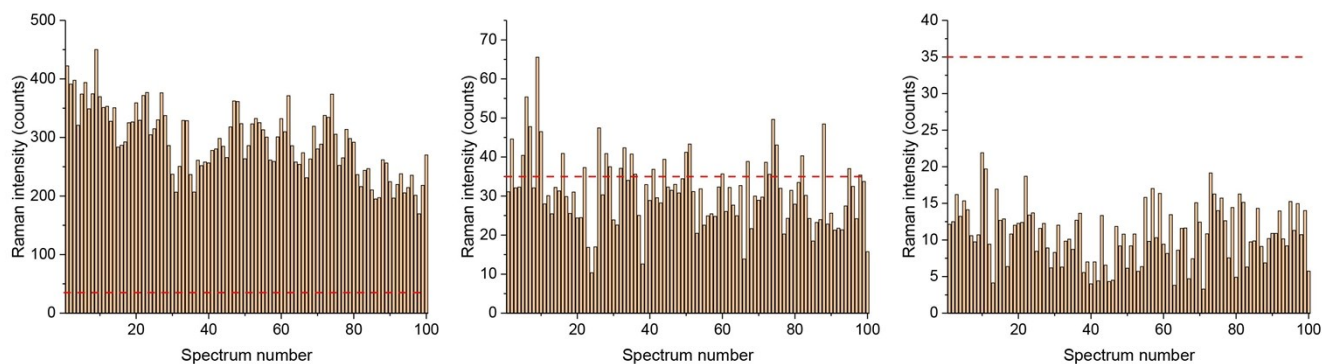

**Figure S4.** The intensity of Raman band at  $1206\text{ cm}^{-1}$  of 100 measurements from 10 fM (left), 1 fM (middle), and 0.1 fM (right) GERRTs solution. Red dotted lines represent the background Raman signal ( $1206\text{ cm}^{-1}$ ) without GERRTs.

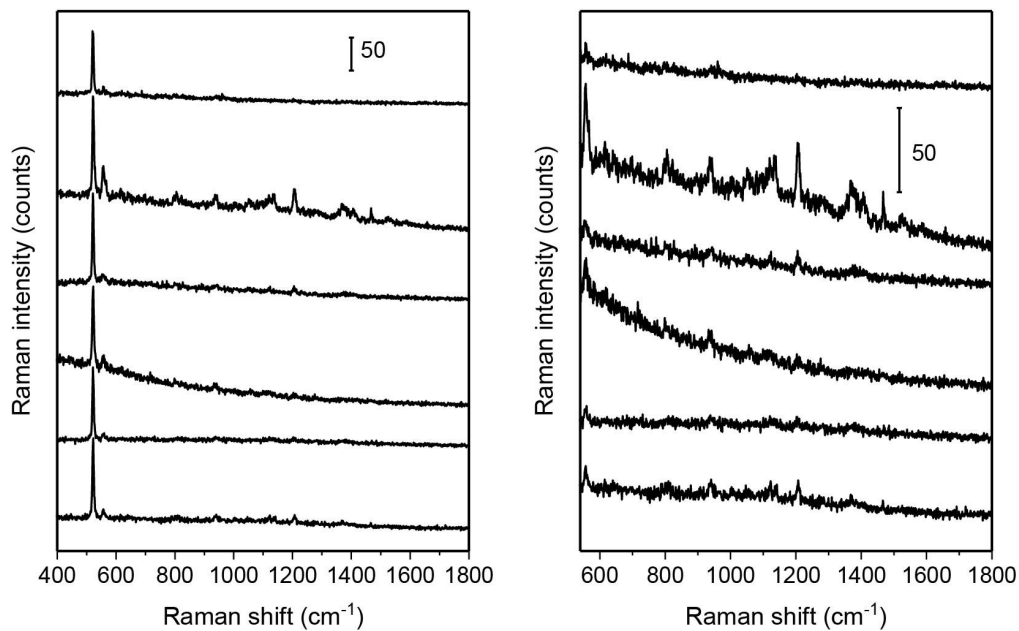

**Figure S5.** SERS spectra of the other six single GERRTs measured using the RISE system. The right is the same with the left except the exclusion of the Raman band at 523  $\text{cm}^{-1}$  to zoom in on other bands.

**Table S1 | Zeta potentials of GERRTs before and after surface functionalization.**

| Raman tag      | Zeta potential (mV) | Average (mV)   |
|----------------|---------------------|----------------|
| GERRTs         | 60.2                | $59.0 \pm 2.5$ |
|                | 60.8                |                |
|                | 55.9                |                |
| GERRTs@PDA     | 54.3                | $50.8 \pm 2.5$ |
|                | 49.3                |                |
|                | 48.7                |                |
| GERRTs@PDA@PEG | 7.9                 | $10.1 \pm 1.7$ |
|                | 10.3                |                |
|                | 12.1                |                |
